# Supplementary material for: Effect of claudin 1 on cell proliferation, migration and apoptosis in human cervical squamous cell carcinoma
Source: PubMed Central journal article supplement — Oncol Rep. 2020 Dec 8;45(2):606–18. doi: 10.3892/or.2020.7889 (PMC7757103; doi:10.3892/or.2020.7889), 2020-12-08

Figure S1. Verification of stable cell lines with p63 overexpression or knockdown. (A) Reverse transcription-quantitative PCR analysis and (B) western blotting were performed to verify the mRNA and protein levels, respectively, of p63 in ME-180/NC and ME-180/shp63 cell lines. (C) Reverse transcription-quantitative PCR analysis and (D) western blotting were performed to verify the mRNA and protein levels, respectively, of p63 in SiHa/Con and SiHa/p63 cell lines. NC, negative control; Con, control.

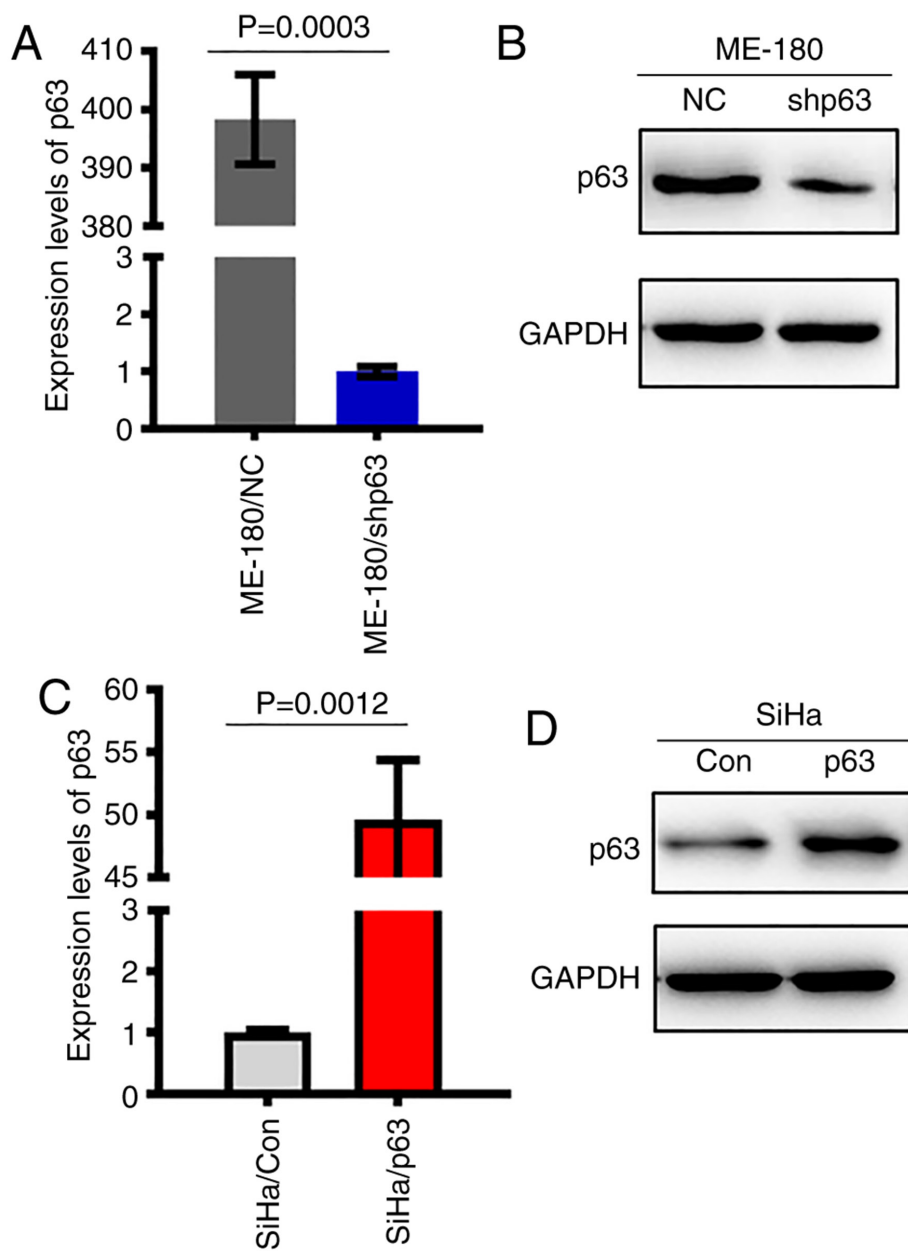

Supplement: Supplementary_Data.pdf [file Supplementary_Data.pdf]
